# Supplementary material for: Abnormal Cardiac Repolarization After Seizure Episodes in Structural Brain Diseases: Cardiac Manifestation of Electrical Remodeling in the Brain?
Source: PubMed Central journal article supplement — J Am Heart Assoc. 2021 Apr 26;10(9):e019778. doi: 10.1161/JAHA.120.019778 (PMC8200721; doi:10.1161/jaha.120.019778), 2021-04-26
Supplement: JAH3-10-e019778-s001.pdf [file JAH3-10-e019778-s001.pdf]

# **SUPPLEMENTAL MATERIAL**

**Table S1. QTc intervals.**

| Female |     |         |          |          | Female     |     |         |          |          |
|--------|-----|---------|----------|----------|------------|-----|---------|----------|----------|
| Normal |     |         |          |          | Structural |     |         |          |          |
|        | Age | QTc Baz | QTc Fred | QTc Fram |            | Age | QTc Baz | QTc Fred | QTc Fram |
| 1      | 22  | 454.4   | 435.5    | 400.0    | 1          | 85  | 557.9   | 528.7    | 475.0    |
| 2      | 63  | 474.8   | 432.9    | 360.1    | 2          | 69  | 528.5   | 500.9    | 450.0    |
| 3      | 63  | 413.1   | 379.4    | 320.1    | 3          | 68  | 471.3   | 438.7    | 380.1    |
| 4      | 37  | 422.0   | 384.8    | 320.1    | 4          | 62  | 494.5   | 451.0    | 375.1    |
| 5      | 15  | 403.3   | 386.5    | 355.0    | 5          | 63  | 490.6   | 450.5    | 380.1    |
| 6      | 35  | 480.7   | 444.5    | 380.1    | 6          | 37  | 494.5   | 451.0    | 375.1    |
| 7      | 87  | 391.0   | 349.8    | 280.1    | 7          | 65  | 483.0   | 433.9    | 350.1    |
| 8      | 23  | 455.4   | 409.1    | 330.1    | 8          | 67  | 456.4   | 427.5    | 375.1    |
| 9      | 30  | 424.3   | 378.0    | 300.1    | 9          | 50  | 674.2   | 610.3    | 500.1    |
| 10     | 22  | 390.5   | 380.0    | 360.0    | 10         | 86  | 496.1   | 461.8    | 400.1    |
| 11     | 54  | 364.6   | 363.1    | 360.0    | 11         | 76  | 552.1   | 495.8    | 400.1    |
| 12     | 18  | 369.5   | 352.2    | 320.0    | 12         | 56  | 542.3   | 527.8    | 500.0    |
| 13     | 49  | 493.3   | 456.1    | 390.1    | 13         | 64  | 486.9   | 456.0    | 400.1    |
| 14     | 75  | 434.6   | 436.4    | 440.0    | 14         | 81  | 395.3   | 396.9    | 400.0    |
| 15     | 92  | 425.3   | 386.8    | 320.1    | 15         | 63  | 465.1   | 432.9    | 375.1    |
| 16     | 71  | 384.8   | 383.2    | 380.0    | 16         | 74  | 521.7   | 456.7    | 350.1    |
|        |     |         |          |          | 17         | 71  | 520.9   | 484.9    | 420.1    |

  

| Male   |     |         |          |          | Male       |     |         |          |          |
|--------|-----|---------|----------|----------|------------|-----|---------|----------|----------|
| Normal |     |         |          |          | Structural |     |         |          |          |
|        | Age | QTc Baz | QTc Fred | QTc Fram |            | Age | QTc Baz | QTc Fred | QTc Fram |

|    |    |       |       |       |    |    |       |       |       |
|----|----|-------|-------|-------|----|----|-------|-------|-------|
| 1  | 43 | 436.7 | 431.1 | 420.0 | 1  | 59 | 495.0 | 441.0 | 350.1 |
| 2  | 62 | 390.5 | 380.0 | 360.0 | 2  | 70 | 537.9 | 506.8 | 450.0 |
| 3  | 49 | 392.6 | 374.2 | 340.0 | 3  | 74 | 532.8 | 499.9 | 440.0 |
| 4  | 31 | 448.5 | 402.9 | 325.1 | 4  | 57 | 483.0 | 433.9 | 350.1 |
| 5  | 70 | 464.3 | 410.1 | 320.1 | 5  | 70 | 483.0 | 433.9 | 350.1 |
| 6  | 34 | 415.7 | 396.2 | 360.0 | 6  | 68 | 385.7 | 377.0 | 360.0 |
| 7  | 35 | 442.7 | 409.4 | 350.1 | 7  | 70 | 454.3 | 444.3 | 425.0 |
| 8  | 45 | 422.0 | 384.8 | 320.1 | 8  | 61 | 559.0 | 489.4 | 375.1 |
| 9  | 64 | 458.5 | 415.0 | 340.1 | 9  | 35 | 471.6 | 416.5 | 325.1 |
| 10 | 77 | 402.5 | 387.8 | 360.0 | 10 | 33 | 484.1 | 444.6 | 375.1 |
| 11 | 22 | 415.9 | 410.5 | 400.0 | 11 | 53 | 652.9 | 576.7 | 450.1 |
| 12 | 35 | 439.6 | 395.4 | 320.1 | 12 | 84 | 487.3 | 483.2 | 475.0 |
| 13 | 70 | 424.3 | 378.0 | 300.1 | 13 | 78 | 434.1 | 404.0 | 350.1 |
| 14 | 41 | 480.0 | 434.5 | 356.1 | 14 | 53 | 448.4 | 408.9 | 340.1 |
| 15 | 45 | 527.5 | 481.0 | 400.1 | 15 | 83 | 519.9 | 513.2 | 500.0 |
| 16 | 53 | 506.0 | 434.3 | 320.1 | 16 | 49 | 508.0 | 478.7 | 425.0 |
| 17 | 53 | 463.8 | 409.8 | 320.1 | 17 | 66 | 537.6 | 497.1 | 425.1 |
| 18 | 79 | 448.4 | 408.9 | 340.1 | 18 | 56 | 474.3 | 438.6 | 375.1 |
| 19 | 30 | 367.7 | 327.6 | 260.1 | 19 | 45 | 505.6 | 457.7 | 375.1 |
|    |    |       |       |       | 20 | 60 | 586.6 | 526.8 | 425.1 |
|    |    |       |       |       | 21 | 73 | 552.1 | 495.8 | 400.1 |
|    |    |       |       |       | 22 | 66 | 456.4 | 427.5 | 375.1 |
|    |    |       |       |       | 23 | 61 | 569.2 | 526.3 | 450.1 |
|    |    |       |       |       | 24 | 54 | 613.2 | 563.2 | 475.1 |
|    |    |       |       |       | 25 | 50 | 560.5 | 511.1 | 425.1 |
|    |    |       |       |       | 26 | 45 | 474.3 | 438.6 | 375.1 |
|    |    |       |       |       | 27 | 73 | 461.7 | 457.8 | 450.0 |
|    |    |       |       |       | 28 | 62 | 535.6 | 501.6 | 440.1 |

|    |    |       |       |       |
|----|----|-------|-------|-------|
| 29 | 56 | 454.3 | 444.3 | 425.0 |
| 30 | 81 | 500.7 | 492.0 | 475.0 |
| 31 | 47 | 461.6 | 420.9 | 350.1 |
| 32 | 79 | 440.4 | 426.5 | 400.0 |
| 33 | 69 | 613.2 | 563.2 | 475.1 |
| 34 | 80 | 548.5 | 522.8 | 475.0 |
| 35 | 63 | 525.9 | 495.5 | 440.0 |
| 36 | 75 | 527.1 | 490.6 | 425.1 |
| 37 | 79 | 493.1 | 459.9 | 400.1 |
| 38 | 23 | 440.4 | 417.4 | 375.0 |
| 39 | 60 | 440.4 | 417.4 | 375.0 |
| 40 | 48 | 539.4 | 488.2 | 400.1 |
| 41 | 79 | 452.9 | 460.1 | 475.0 |
| 42 | 63 | 537.6 | 497.1 | 425.1 |
| 43 | 67 | 432.1 | 398.9 | 340.1 |
| 44 | 42 | 601.0 | 535.5 | 425.1 |

---

QTc, corrected QT intervals; Baz, Bazett formula; Fred, Fridericia; Fram, Framingham formula

Figure S1. Plots of QTc intervals as a function of RR intervals.

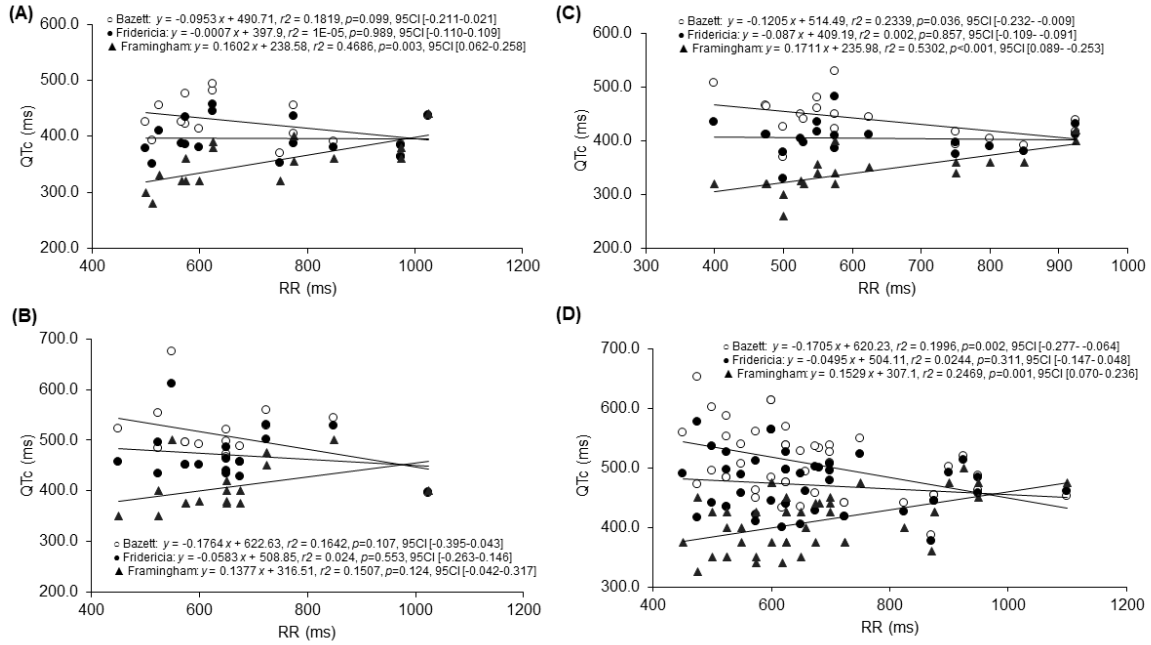

Plots for female patients without (A) and with structural brain diseases (B); male patients without (C) and with structural brain diseases (D). The parameters by linear regression fit are shown in the inset.

**Figure S2. Plots of QTc intervals as a function of lactate values.**

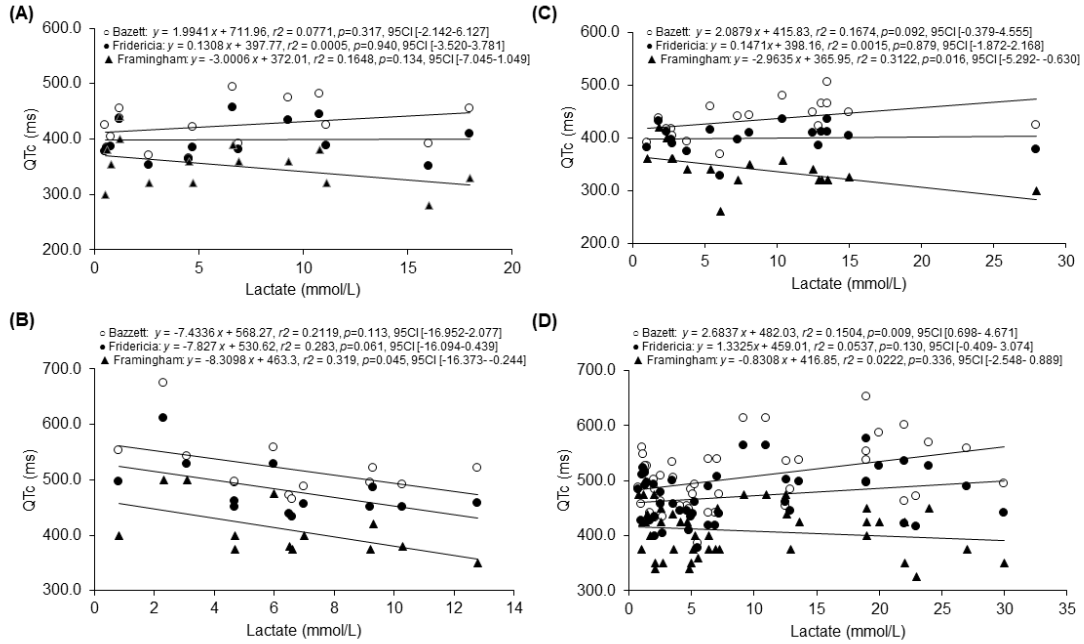

Plots for female patients without (A) and with structural brain diseases (B); male patients without (C) and with structural brain diseases (D). The parameters by linear regression fit are shown in the inset.
